# Supplementary material
Source: Copernicus journal article supplement (doi:10.5194/soil-12-665-2026)
Supplement: Supplementary file 1 [file soil-12-665-2026-supplement.pdf]

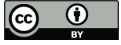

*Supplement of*

## **Improvement of soil properties maps using an iterative residual correction method**

**Chengcheng Xu et al.**

*Correspondence to:* Chengcheng Xu ([chengcheng.xu@duke.edu](mailto:chengcheng.xu@duke.edu))

The copyright of individual parts of the supplement might differ from the article licence.

Table S1. Performance metrics (RMSE,  $R^2$ , and correlation coefficient  $\rho$ ) for posterior predictions of soil properties, including mass fraction of sand content (% mass), silt content (% mass), and clay content (% mass), pH, oven-dry bulk density (BD;  $\text{g cm}^{-3}$ ), and soil organic matter (SOM; % mass) at different depths. This table serves as a supplement to the table 1 in the main context.

| <b>Property</b>                                    | <b>Depth (cm)</b> | <b>RMSE</b> | <b><math>R^2</math></b> | <b><math>\rho</math></b> |
|----------------------------------------------------|-------------------|-------------|-------------------------|--------------------------|
| <b>Sand<br/>(% mass)</b>                           | 0-5               | 6.998       | 0.903                   | 0.951                    |
|                                                    | 5-15              | 6.998       | 0.900                   | 0.949                    |
|                                                    | 15-30             | 7.475       | 0.888                   | 0.942                    |
|                                                    | 30-60             | 9.438       | 0.829                   | 0.911                    |
|                                                    | 60-100            | 10.788      | 0.804                   | 0.898                    |
|                                                    | 100-200           | 12.594      | 0.761                   | 0.874                    |
| <b>Silt<br/>(% mass)</b>                           | 0-5               | 5.340       | 0.861                   | 0.928                    |
|                                                    | 5-15              | 5.384       | 0.849                   | 0.922                    |
|                                                    | 15-30             | 5.754       | 0.822                   | 0.908                    |
|                                                    | 30-60             | 6.602       | 0.768                   | 0.878                    |
|                                                    | 60-100            | 7.156       | 0.748                   | 0.867                    |
|                                                    | 100-200           | 8.488       | 0.704                   | 0.842                    |
| <b>Clay<br/>(% mass)</b>                           | 0-5               | 3.020       | 0.947                   | 0.973                    |
|                                                    | 5-15              | 4.414       | 0.891                   | 0.944                    |
|                                                    | 15-30             | 5.111       | 0.872                   | 0.934                    |
|                                                    | 30-60             | 5.962       | 0.793                   | 0.892                    |
|                                                    | 60-100            | 6.888       | 0.813                   | 0.903                    |
|                                                    | 100-200           | 6.947       | 0.788                   | 0.890                    |
| <b>pH<br/>(<math>\log_{10}[\text{H}^+]</math>)</b> | 0-5               | 0.213       | 0.957                   | 0.979                    |
|                                                    | 5-15              | 0.260       | 0.936                   | 0.968                    |
|                                                    | 15-30             | 0.259       | 0.943                   | 0.971                    |
|                                                    | 30-60             | 0.295       | 0.935                   | 0.967                    |
|                                                    | 60-100            | 0.302       | 0.941                   | 0.970                    |
|                                                    | 100-200           | 0.269       | 0.956                   | 0.978                    |
| <b>BD<br/>(<math>\text{g cm}^{-3}</math>)</b>      | 0-5               | 0.166       | 0.710                   | 0.847                    |
|                                                    | 5-15              | 0.173       | 0.673                   | 0.826                    |
|                                                    | 15-30             | 0.163       | 0.684                   | 0.832                    |
|                                                    | 30-60             | 0.170       | 0.656                   | 0.816                    |
|                                                    | 60-100            | 0.163       | 0.691                   | 0.835                    |
|                                                    | 100-200           | 0.146       | 0.667                   | 0.821                    |
| <b>SOM<br/>(% mass)</b>                            | 0-5               | 3.335       | 0.476                   | 0.755                    |
|                                                    | 5-15              | 2.560       | 0.514                   | 0.743                    |
|                                                    | 15-30             | 1.626       | 0.664                   | 0.826                    |
|                                                    | 30-60             | 1.522       | 0.654                   | 0.816                    |
|                                                    | 60-100            | 1.026       | 0.706                   | 0.852                    |
|                                                    | 100-200           | 1.175       | 0.597                   | 0.794                    |

Table S2. Number of available soil observations for each soil property and depth interval used in this study. Reported values indicate the count of samples available over California to perform iteratively residual correction for mass percentage of sand content (% mass), silt content (% mass), and clay content (% mass), pH, soil organic matter (SOM; mass fraction), and oven-dry bulk density (BD;  $\text{g cm}^{-3}$ ) within each depth interval.

| <b>Depth interval<br/>(cm)</b> | <b>Sand<br/>(% mass)</b> | <b>Silt<br/>(% mass)</b> | <b>Clay<br/>(% mass)</b> | <b>pH<br/>(<math>\log_{10}[\text{H}^+]</math>)</b> | <b>SOM<br/>(% mass)</b> | <b>BD<br/>(<math>\text{g cm}^{-3}</math>)</b> |
|--------------------------------|--------------------------|--------------------------|--------------------------|----------------------------------------------------|-------------------------|-----------------------------------------------|
| 0-5                            | 3,856                    | 3,920                    | 3,083                    | 2,806                                              | 2,048                   | 2,254                                         |
| 5-15                           | 3,607                    | 3,621                    | 2,995                    | 3,885                                              | 2,770                   | 3,283                                         |
| 15-30                          | 2,044                    | 2,036                    | 1,814                    | 4,247                                              | 3,141                   | 3,256                                         |
| 30-60                          | 1,348                    | 1,333                    | 1,305                    | 4,909                                              | 3,588                   | 4,217                                         |
| 60-100                         | 1,048                    | 1,047                    | 1,045                    | 4,545                                              | 3,306                   | 3,732                                         |
| 100-200                        | 905                      | 896                      | 866                      | 3,717                                              | 2,616                   | 2,814                                         |
| <b>Total</b>                   | <b>12,808</b>            | <b>12,853</b>            | <b>11,108</b>            | <b>24,109</b>                                      | <b>17,469</b>           | <b>19,556</b>                                 |
